# Supplementary material
Source: publisher figshare collection journal article supplement (https://gsapubs.figshare.com/ndownloader/files/31833338)
Supplement: Supplementary file 1 [file 31833338]

## Sheet: Sheet1
Supplemental Data: Bulk chemical data of samples of this study and plotted in figures 5, 9, and 10.
* = see list below checmical data for full unit names
Sample ID	MC19A	MC20A	MC23A	MC24A	MC-1-BC	MC-2-BC	MC-1-16	MC-37-16	MC-58-16	MC-107-16		MC1A	MC33A	MC1C	MC2C	MC4C	MC-5-16	MC-39-16	MC-61-16	MC-62-16	MC-99-16	MC-114-16	MC-115-16	MC-118-16		MC-3-BC		MC-12-16	MC-23-16	MC-45-16	MC-63-16	MC-69-16	MC-73-16		MC5B	MC20C	MC-87-16		MC1B	MC18C-1	MC-59-16		MC-25B-16		MC-24-16		MC-3-16		MC-52-16
Lithology	Tuff	Tuff	Tuff	Tuff	Tuff	Tuff	Tuff	Tuff	Tuff	Tuff		Tuff	Tuff	Tuff	Tuff	Tuff	Tuff	Tuff	Tuff	Tuff	Tuff	Tuff	Tuff	Tuff		Tuff		Tuff	Tuff	Tuff	Tuff	Tuff	Tuff		Lava	Lava	Lava		Lava	Lava	Lava		Lava		Lava		Lava		Lava
Unit*	DIT1	DIT1	DIT1	DIT1	DIT1	DIT1	DIT1	DIT1	DIT1	DIT1		DIT2	DIT2	DIT2	DIT2	DIT2	DIT2	DIT2	DIT2	DIT2	DIT2	DIT2	DIT2	DIT2		DIT3		DIT4	DIT4	DIT4	DIT4	DIT4	DIT4		RB	RB	RB		LM	LM	LM		LPC		UPC		BC		HC
Latitude	44.09	44.0901	44.109	44.1066	44.0397	44.0397	44.0194	44.0843	44.2357	44.3296		43.9789	44.0777	44.2568	44.2477	44.2501	44.0175	44.0865	44.0182	44.023	44.2709	44.2316	44.2316	44.1985		44.0276		44.006	44.0191	44.0603	44.0345	44.0686	44.0531		44.1532	44.1606	44.1273		44.1159	44.2566	44.2357		44.0009		44.0178		44.0293		44.1035
Longitude	-118.164	-118.175	-118.169	-118.172	-117.845	-117.845	-118.176	-118.203	-118.249	-118.133		-118.117	-118.185	-118.149	-118.131	-118.138	-118.174	-118.202	-118.207	-118.207	-118.126	-118.164	-118.164	-118.171		-117.83		-118.156	-118.171	-118.168	-118.217	-118.233	-118.116		-118.226	-118.177	-118.145		-118.198	-118.194	-118.249		-118.165		-118.173		-118.175		-118.147
Comment																					slightly silicified sample			slightly silicified sample		sample from outside of study area
XRF, wt % normalized
SiO2	76.4091	76.8191	76.6967	76.9002	76.4374	76.0599	76.9869	77.9022	77.2779	77.6096		71.7283	74.2257	74.7225	71.7234	73.2106	68.7817	75.6167	74.7314	72.98	78.117	70.6237	71.4868	78.5839		76.131		65.6242	70.2746	61.3578	70.1448	62.4217	69.8644		50.1727	51.0097	50.6741		68.1025	65.0418	62.7059		50.5882		52.4444		56.3758		52.3331
TiO2	0.166146	0.16185	0.165744	0.165223	0.193903	0.174672	0.176302	0.139208	0.163791	0.203945		0.453131	0.264824	0.210751	0.393138	0.346529	0.845302	0.321412	0.24969	0.322167	0.226621	0.463863	0.422318	0.16227		0.159251		1.06923	0.699599	1.28076	0.603751	1.45762	0.851877		1.7285	1.63242	1.85391		0.67125	0.566357	0.911825		1.58077		1.91161		2.3483		1.92204
Al2O3	12.3213	12.2209	12.3361	12.3474	12.585	12.3182	12.2409	11.9748	12.7136	12.7575		13.9428	13.1635	13.2099	13.7111	13.8882	15.4872	13.8514	13.2007	13.9635	12.8355	13.7524	13.7421	13.0279		12.7259		14.5293	13.9803	15.1045	14.479	14.6368	14.0757		16.8299	16.5813	15.1154		16.5257	16.3542	16.7037		17.6053		15.3028		14.4853		15.2745
FeO*	2.09783	2.16572	2.01779	1.89097	1.96591	2.34887	2.04796	1.53052	1.04058	0.981557		4.50961	3.52885	2.37245	4.11202	2.96652	5.58412	2.0674	2.41819	3.59582	1.60422	4.2643	4.30725	0.870439		1.48662		9.20061	4.24002	10.536	5.06213	10.3637	5.8232		9.77883	9.08166	9.24061		2.12102	4.27841	5.21607		11.3815		10.9981		10.7719		11.0272
MnO	0.0573814	0.0196359	0.0412107	0.0314504	0.0247182	0.0570475	0.0261581	0.00959739	0.0151364	0.00946784		0.0829561	0.137928	0.0472052	0.0818566	0.0311061	0.104824	0.0321081	0.0556289	0.0693278	0.00393729	0.0885954	0.0836058	0.000295594		0.0756817		0.156654	0.0829036	0.184814	0.074193	0.158897	0.0635254		0.16499	0.157749	0.151771		0.0769174	0.0764046	0.0974831		0.155183		0.195811		0.243049		0.186462
MgO	0.0172922	0.00455077	0.0147362	0.0137981	0.0706584	0.0446152	0.00700081	0.0563113	0.159578	0.0765978		1.30479	0.719287	0	0.395523	0.246331	1.17849	0.278369	0.060491	0.92882	0.276694	0.530009	0.329849	0.45214		0.0969279		1.37515	0.767418	2.54414	0.668137	2.7639	0.448524		6.78948	5.83314	7.03699		0.846311	2.3691	2.47383		4.06348		5.15166		2.96303		5.32915
CaO	0.428921	0.210143	0.326394	0.323153	0.371986	0.592016	0.273151	0.211771	0.284353	0.286788		1.63434	1.22898	1.0467	1.93945	1.46615	2.69629	1.30132	0.941104	1.01568	0.230125	2.51193	1.95044	0.515589		0.387733		3.61918	1.9846	5.15532	1.51469	4.60768	1.77636		8.65503	9.64324	9.49619		4.32926	5.18931	5.16494		11.7916		9.3418		7.5508		9.35867
Na2O	3.55143	4.58117	4.54788	4.43559	4.57996	3.85201	4.49974	4.46923	4.51658	4.21451		2.05597	1.55545	4.73523	3.56343	3.90534	2.7383	2.5216	3.64193	3.75302	1.68616	3.8892	3.58062	2.63856		2.91319		2.12955	4.69307	2.11982	3.59814	1.48648	2.78107		4.07017	3.9727	4.19808		5.33957	3.26555	3.69387		2.49786		3.15089		3.20883		3.14406
K2O	4.94316	3.79719	3.84083	3.8718	3.7122	4.53365	3.718	3.69312	3.81846	3.84463		4.2238	5.15492	3.64279	3.99387	3.87437	2.46159	3.98867	4.68035	3.31111	5.00315	3.785	4.02998	3.73747		6.01014		2.07739	2.93928	1.44788	3.72788	1.69803	4.0588		1.23476	1.39487	1.3862		1.81454	2.65642	2.74512		0.148436		1.19863		1.65865		1.12412
P2O5	0.00742744	0.0196763	0.0126093	0.0204443	0.0582636	0.0190055	0.0238909	0.0132759	0.0100101	0.0154519		0.0642978	0.0205333	0.0128439	0.0861486	0.0648337	0.122234	0.0210884	0.0204811	0.0605538	0.0166666	0.0909843	0.0670939	0.0113982		0.0135481		0.218716	0.338121	0.268938	0.127276	0.405168	0.256457		0.575692	0.693176	0.846773		0.172921	0.202502	0.287258		0.187675		0.304416		0.394247		0.300779
pre-normalization total	96.1395	98.6086	98.2428	98.3599	98.1059	97.0868	98.5562	98.6727	98.1738	97.9463		90.9969	89.6471	98.7723	93.8959	96.0259	94.0149	91.5691	96.227	93.85	97.0211	96.3768	96.3099	94.7247		95.6463		89.554	95.9307	89.8886	92.4885	87.8358	92.9134		98.1549	96.9796	98.0342		95.2992	97.5926	98.0678		95.6478		98.2275		98.3466		98.2352
LOI %	3.32447	0.755405	0.732401	0.815956	1.37505	2.29105	0.696468	0.567477	1.02683	1.28618		8.7449	8.84573	0.445981	5.04869	3.46199	5.39413	6.02095	2.99239	5.43649	2.34165	2.91927	2.74422	4.34851		3.58886		10.1183	3.28011	9.32439	6.39634	11.4627	6.13083		0.982481	2.27932	1.10703		4.01645	1.16656	1.21738		3.74374		0.846354		1.15538		0.957741
XRF, ppm
Ni	0.505	0.8955	1.592	2.388	6	2.9145	2.4875	2.4	2.4	1.99		4.356	1.0945	0.6965	2.1	1.99	13.8	8.585	3.232	3.939	2.3	1.515	3.9195	2		3.737		2	2.3	11.055	3.3	2.8855	3.5175		143.877	142.56	150.876		5.572	28.5565	12.4375		169.276		52.1		7.2		50.5515
Cr	2.02	0.8955	1.8905	3.184	2.3	2.412	3.383	3.7	3	3.8805		3.762	0.0995	0.995	3.1	2.8855	25.4	7.272	2.323	4.343	2.9	5.151	4.02	2.8		1.515		12	7.7	9.9495	5.5	0.4975	4.9245		188.951	168.597	209.088		6.4675	46.0685	20.9945		337.34		131.4		4.8		134.368
Sc	4.343	3.8805	3.6815	3.8805	4.9	4.623	3.0845	4.1	2.7	3.781		11.286	5.2735	2.786	7.8	6.567	17.5	7.676	5.353	6.161	4.8	8.383	7.7385	3.5		5.252		23.8	11.3	27.2355	11.2	21.5915	14.07		23.1835	22.473	22.473		14.8255	9.95	11.741		33.734		33.9		33.3		33.4665
V	3.535	8.0595	6.0695	8.6565	11.5	5.427	8.756	5.4	7.4	9.0545		71.775	21.293	1.791	24	21.9895	119.9	26.361	4.444	17.069	4.3	44.238	26.8335	0.4		8.686		30	34.8	182.407	21.4	143.38	44.9235		200.194	192.951	243.144		78.804	90.8435	106.067		300.374		306.2		375		311.047
Ba	1466.02	1473.79	1485.73	1475.49	1508.23	1492.53	1445.14	1404.6	1450.7	1382.25		1170.18	1162.86	1337.98	1324	1290.12	1222.9	1267.55	1659.53	1401.88	2540.4	1191.5	1221.58	771		641.439		1175.5	1476.3	935.554	1471.3	822.168	1422.07		636.8	738.045	656.37		1085.35	1023.46	897.391		195.334		478.9		981		470.34
Rb	79.992	78.3065	77.7095	76.018	74.872	76.436	75.068	74.663	77.7165	78.204		67.419	100.694	87.56	88.5	80.4955	54.6675	82.2865	81.988	41.8895	103.622	75.3215	79.398	87.468		87.714		49.9395	37.5285	28.512	68.6545	35.182	78.111		14.4275	12.969	17.745		54.526	34.7255	45.374		2.8855		22.261		44.719		20.493
Sr	26.967	26.3675	25.87	26.865	41.1	32.4615	31.5415	21.6	29.4	32.9345		109.692	69.451	103.977	173.4	164.473	177.6	126.654	107.767	131.603	73.2	168.367	154.267	35.6		15.857		254	178.3	242.004	159.8	230.243	204.718		1071.32	1343.23	1483.52		895.4	484.764	516.903		345.42		407.5		363.5		412.15
Zr	437.88	447.834	450.258	447.228	446.701	438.192	436.252	390.832	446.264	457.47		357.076	389.456	355.52	315.563	331.583	206.648	169.575	397.11	375.585	335.504	302.4	313.186	326.352		308.832		188.968	322.712	154.346	337.584	185.161	292.495		158.772	148.237	164.8		253.005	139.178	200.583		72.135		140.192		210.496		140.866
Y	90.193	55.2225	74.824	87.759	74.1	87.1335	72.3365	59.6	68.2	75.7195		67.617	60.9935	64.1775	57.4	58.108	55.9	45.046	68.781	70.397	53.4	58.681	64.6215	54.6		87.567		45.6	47.8	48.9435	55.9	46.367	58.7925		24.1785	20.196	19.899		37.412	13.134	21.5915		21.513		30.4		47.2		30.4515
Nb	24.846	24.7755	24.676	25.671	24.6	23.919	24.5765	24.7	25.9	25.3725		21.087	17.4125	14.129	14	14.6265	15.1	12.423	22.725	21.412	14.4	14.241	13.9695	13.4		30.098		9.6	21.1	7.437	21.9	9.8505	19.497		13.4325	13.167	16.038		6.6665	5.4725	11.343		3.535		7.4		13.6		8.241
Ga	20.301	21.293	21.7905	20.696	21.8	20.8035	20.895	21.9	22.3	21.89		20.988	17.91	20.497	20.1	19.9	19.9	17.372	23.432	22.523	18.8	19.291	20.2005	19.6		20.2		18.4	20.3	19.497	20.2	18.2085	20.502		17.512	17.919	20.988		16.8155	17.114	18.8055		18.887		19.6		22.3		19.698
Cu	2.424	3.2835	2.985	3.0845	6.8	6.3315	3.0845	1	1.5	3.0845		9.801	2.388	0.995	2.6	3.383	49.6	7.373	2.727	6.868	3.1	2.929	4.824	1.8		12.423		8.6	4.6	15.1755	4.3	7.363	5.1255		65.5705	55.836	75.933		28.7555	32.238	18.706		131.906		136.4		50.9		136.278
Zn	154.934	152.334	132.136	103.082	137.7	146.931	136.713	150.8	78.1	102.684		140.184	128.056	136.116	149.1	164.772	101.7	61.408	135.542	124.028	111.2	152.409	154.669	42.4		102.717		156.5	118.2	128.941	152.9	176.911	146.328		90.0475	95.535	146.322		89.2515	71.3415	82.585		75.447		101		137.3		101.404
Pb	18.685	16.6165	15.92	13.532	17.4	13.668	18.8055	16.3	15.7	21.7905		15.939	17.711	16.0195	12.9	13.4325	13.1	17.473	15.958	14.443	16.7	13.13	13.7685	12.8		20.099		7.7	10.1	7.236	12.6	9.6515	11.3565		4.2785	5.346	6.831		8.4575	9.552	8.358		1.414		4.2		8.2		5.3265
La	46.864	23.9795	40.6955	53.332	50.2	41.406	43.382	29	40.4	38.5065		40.392	34.029	32.238	28.1	34.427	28.9	32.926	43.43	42.218	29.5	32.32	33.165	32.2		40.4		20.9	32.1	19.698	34	19.8005	35.376		26.865	28.908	39.897		26.1685	24.3775	25.671		8.484		14		22.5		14.874
Ce	92.92	31.7405	86.764	66.3665	93.4	91.656	102.485	61.6	70.4	70.048		87.417	69.7495	64.277	62.9	58.307	66.3	62.923	86.557	86.86	63.6	68.579	62.511	63		91.102		48.9	72	35.778	71.5	43.78	65.0235		51.74	65.34	89.793		43.6805	39.7005	54.4265		15.554		37.4		57.6		32.0595
Th	7.575	8.4575	7.96	7.4625	7.7	7.638	7.562	7.9	8.6	7.761		6.732	8.557	7.6615	7.3	7.562	4.8	7.474	6.464	6.363	8.5	6.565	6.7335	8.7		8.08		4.5	6	3.5175	6.8	4.0795	6.231		2.6865	3.267	5.544		4.8755	3.781	5.572		1.01		3.4		5.5		3.5175
Nd	45.854	31.641	45.969	48.755	52.3	43.416	44.2775	34.1	45.7	41.0935		42.372	35.3225	34.228	32.8	35.422	36	29.189	44.642	45.248	29.2	34.744	35.175	33		43.733		29.1	35.4	24.2205	35.8	27.3625	35.2755		29.1535	36.828	44.946		26.666	18.706	26.467		12.322		22.5		31.8		20.301
U	4.141	2.786	3.0845	2.0895	2.9	4.7235	2.786	2.6	4	3.4825		2.475	3.0845	4.4775	2.3	2.587	1.2	3.737	3.535	2.525	3.9	3.939	3.819	3.1		3.939		3	2.2	1.9095	2.7	1.393	4.3215		1.8905	0.693	2.97		3.8805	1.8905	1.592		1.212		2.2		2.2		2.1105
ICP-MS, ppm
La	44.8286	26.4929	42.5443	50.4253	51.2733	46.2692	42.9752	32.379	43.5377	39.4609		40.5649	35.7664	33.8532	31.3988	33.6863	33.5368	33.5149	44.1636	45.9158	30.6503	30.8256	32.7666	33.8367		38.3241		22.9216	32.572	20.0628	36.3908	21.9692	35.2917		26.1136	31.8545	41.6908		22.882	22.011	28.5849		5.75059		14.4934		26.018		14.588
Ce	93.5369	35.7054	84.3943	72.3483	99.6264	95.7895	105.975	63.1104	72.7801	73.976		84.985	74.8831	69.9023	65.787	62.6429	68.5325	67.432	86.8575	89.8809	66.2935	64.722	66.5908	69.5143		93.6848		48.8236	71.9436	38.2635	71.1459	44.4805	71.5494		55.5996	70.5862	89.3245		48.712	40.7977	55.6212		14.2469		33.0675		55.5476		33.501
Pr	11.7274	8.49295	11.7589	13.0175	14.4588	12.3093	11.36	9.15582	12.3998	11.2486		10.8763	9.41618	9.24186	8.64762	9.07502	8.82659	8.24628	11.589	12.0531	8.34177	8.51587	9.11648	9.15145		11.6748		6.74666	9.12524	5.62635	9.76956	6.33616	9.3327		7.5594	9.30167	11.4503		6.57922	4.72607	6.85417		2.18862		4.68513		7.37645		4.69097
Nd	47.025	32.7953	46.2833	52.5628	56.4403	48.5906	45.2939	36.5158	49.0905	42.8538		43.5013	37.2063	37.7743	34.8716	36.7634	36.4817	31.4142	46.583	48.7197	33.1167	35.2502	37.8972	36.452		46.8132		29.1623	36.565	23.9684	39.6888	26.967	38.7698		30.5341	37.5691	45.4024		27.3228	17.6571	26.3326		10.8758		21.4546		32.3473		21.3519
Sm	11.086	7.87248	10.9692	12.0752	12.9258	11.3298	10.5037	8.63338	11.2106	9.93488		10.131	8.4729	9.30293	8.41221	8.89958	8.78158	6.99236	10.8295	11.182	7.82035	8.45836	9.2221	8.45057		12.5298		6.96611	8.30622	5.91683	9.14603	6.56649	9.11853		6.14988	7.00411	8.27263		6.30611	3.51152	5.09292		3.24784		5.62956		7.92676		5.56281
Eu	1.40777	1.54525	1.68188	2.02966	1.92669	1.73319	1.73243	1.56624	1.9531	1.60451		2.23249	1.33227	1.56469	1.58196	1.63108	1.95942	1.19634	2.22987	2.42388	1.19971	1.64973	1.88423	1.30511		1.28801		1.92611	2.12592	1.64331	2.22993	1.95746	2.30679		1.94502	2.03174	2.28693		1.50152	1.00812	1.36306		1.40468		1.91175		2.47058		1.87396
Gd	11.6224	7.43938	10.6042	12.5641	11.9249	11.7366	10.8322	8.4801	10.0802	9.30781		10.3519	8.81059	9.39384	8.5317	8.73227	9.24327	6.84097	10.7535	11.0566	7.50946	8.80685	9.66147	8.47924		12.8552		7.60133	7.92852	6.66539	8.91878	7.28247	9.27602		5.50991	5.36631	5.94883		6.25651	2.96515	4.52753		3.96626		6.13021		8.46724		6.08128
Tb	2.21237	1.45736	2.01468	2.27759	2.19256	2.18848	2.05495	1.62195	1.92347	1.85279		1.83378	1.60025	1.70346	1.54761	1.56277	1.62123	1.24109	1.92967	1.92408	1.4223	1.60038	1.706	1.52172		2.40094		1.31138	1.38701	1.21726	1.5573	1.27836	1.59336		0.836548	0.780511	0.825011		1.05097	0.45392	0.704837		0.696726		1.03332		1.39501		1.00041
Dy	15.1262	10.1103	13.5478	15.1334	14.2805	14.8855	13.6272	10.9164	12.6135	12.7207		12.1011	10.816	11.4612	10.3156	10.333	10.4204	7.89989	12.5506	12.3409	9.5119	10.1944	11.1268	9.72914		15.5127		8.28203	8.74341	8.11961	9.91079	8.28332	10.2068		4.89383	4.39358	4.34478		6.81457	2.66311	4.1443		4.23121		6.23058		8.57751		6.18661
Ho	3.38817	2.23393	2.94151	3.29715	2.96618	3.23617	2.9413	2.42776	2.78078	2.87548		2.58128	2.35523	2.42826	2.19726	2.18744	2.17253	1.68793	2.65709	2.61421	2.08566	2.24632	2.40538	2.07736		3.28449		1.76501	1.79989	1.76616	2.09958	1.79152	2.20548		0.989295	0.839619	0.806235		1.41902	0.518674	0.833919		0.869787		1.25296		1.78233		1.21264
Er	9.78641	6.83046	8.52708	9.44889	8.61553	9.49013	8.56566	7.18743	8.07697	8.64237		7.23241	6.95227	7.04761	6.1795	6.32797	5.96328	4.83505	7.60904	7.50342	5.88703	6.28506	6.90618	5.90175		9.33141		4.96855	5.02188	5.1092	5.91246	5.13224	6.18373		2.58594	2.0981	2.03562		3.85796	1.37476	2.23346		2.31518		3.27197		4.74502		3.26501
Tm	1.53386	1.12827	1.34967	1.4554	1.34912	1.49059	1.36655	1.13868	1.27132	1.36942		1.10653	1.07792	1.04401	0.937491	0.940251	0.910462	0.753101	1.1513	1.12521	0.909965	0.944761	1.04763	0.912949		1.40937		0.739471	0.750912	0.756785	0.898821	0.747287	0.938825		0.360985	0.281369	0.27696		0.56301	0.189133	0.318897		0.318014		0.46214		0.669014		0.463096
Yb	10.1349	8.04973	8.90628	9.52855	9.00715	9.72024	8.98972	7.50034	8.26043	9.0398		7.1934	7.0688	6.90785	6.1736	6.00885	5.55663	4.83386	7.28823	7.2407	5.89462	6.23023	6.82208	5.85061		9.03056		4.63037	4.69785	4.83327	5.83319	4.83013	5.95939		2.22351	1.73664	1.65428		3.58146	1.20202	1.98799		1.95822		2.81601		4.05177		2.79412
Lu	1.63432	1.30888	1.39686	1.51991	1.39635	1.54865	1.46756	1.20027	1.28718	1.47366		1.14076	1.13705	1.07675	0.976827	0.959252	0.905095	0.77681	1.17059	1.14701	0.940098	0.991228	1.11066	0.955948		1.4461		0.762669	0.757608	0.802286	0.970375	0.800333	0.991032		0.354098	0.268583	0.258368		0.56501	0.196058	0.310479		0.297738		0.448278		0.638316		0.430082
Ba	1482.73	1499.79	1514.95	1494.62	1529.17	1509.77	1510.13	1477.33	1520.36	1444.5		1191.12	1186.78	1354.6	1334.74	1319.26	1254.75	1321.69	1711.98	1445.2	2657.12	1222.19	1244.95	805.568		639.561		1196.75	1536.15	950.266	1501.62	832.262	1452.23		629.583	731.828	654.188		1098.39	1016.48	915.049		189.156		477.588		986.09		471.248
Th	7.92943	8.16451	8.31567	8.30671	8.0175	7.91489	7.82698	8.1477	8.03561	8.42852		6.56339	8.19877	7.83368	6.8139	7.18954	5.37342	7.92873	7.15794	6.36606	8.34689	6.62272	6.84742	8.18859		8.3118		4.69801	6.12004	2.95159	6.28683	3.73635	5.54086		1.66905	1.91324	4.16986		4.60276	3.4435	4.75657		0.388213		2.07193		4.99274		2.10207
Nb	23.7428	24.5108	24.4579	24.5802	23.6807	23.4954	23.7967	24.2024	25.0967	24.7414		20.2106	16.7567	14.3311	13.6397	14.3519	14.6015	12.1844	21.76	20.4582	13.9899	13.4727	13.9634	13.3147		29.0488		10.0172	20.3203	8.54772	21.2851	9.8754	18.6962		12.7461	12.4861	16.0272		6.82888	6.21565	11.2354		3.88073		7.67815		13.4865		7.67063
Y	88.4495	53.987	74.3911	86.1329	70.9963	84.877	71.2715	59.2643	67.568	76.0514		66.7962	61.4509	63.0973	57.0534	57.42	55.711	44.2869	68.439	69.9506	53.579	58.0285	64.0827	54.0689		85.3373		45.397	46.4454	49.4598	55.1448	47.1486	59.8649		25.7019	20.6436	20.4404		36.8498	13.664	22.1572		21.893		30.8655		47.6866		30.9273
Hf	11.8404	12.2237	12.3818	12.2835	11.7738	11.6824	12.0194	11.4082	12.2396	12.5423		9.53953	10.5427	9.74182	8.5863	8.99685	6.36521	5.53826	10.3507	9.91496	9.21396	8.39758	8.58165	9.09233		9.33457		5.26828	8.49257	4.37671	8.88607	5.11931	7.66061		3.67137	3.56464	4.1923		6.62253	3.51188	4.89142		1.96722		3.88088		5.87012		3.93148
Ta	1.46169	1.49383	1.51189	1.50847	1.42296	1.43232	1.5121	1.51925	1.48851	1.53927		1.29496	1.09375	0.927115	0.864617	0.917387	1.09147	0.91584	1.38804	1.32647	0.925585	0.898186	0.922754	0.935917		1.83828		0.693276	1.28823	0.568437	1.30507	0.637458	1.15944		0.815588	0.677983	0.934527		0.451772	0.480694	0.798128		0.291352		0.549645		0.961041		0.542481
U	3.55144	2.94275	3.67067	3.73763	3.44711	3.37513	2.71179	3.04124	3.7617	3.71882		2.28632	3.46748	3.87991	3.2449	3.39183	1.60337	3.07709	3.00763	2.09796	3.68945	3.29919	3.33689	4.17144		3.4257		2.03223	2.56841	1.29155	2.69557	1.74174	2.64198		0.503176	0.558973	1.45388		2.2466	1.33713	1.62122		0.147447		0.776493		2.29434		0.770967
Pb	17.4258	15.3638	15.1636	11.1205	16.6588	12.8316	17.3783	15.4048	14.6271	20.8511		13.9879	17.4486	14.3236	12.8299	13.1693	13.7128	15.25	14.0016	13.8129	15.867	12.4423	13.2584	10.7845		18.7397		8.76141	9.13747	6.68141	11.9103	8.731	11.4158		4.49117	5.62763	7.45857		7.95296	9.37277	8.34819		1.12837		4.56611		8.56888		4.82743
Rb	75.649	74.5702	75.465	72.6465	74.4648	75.0303	73.7011	75.7414	76.1728	78.0787		64.5617	96.7205	85.044	86.2281	79.2993	54.6237	82.1018	80.1007	40.8345	101.764	73.5158	77.9146	86.8429		85.8061		48.9268	37.5982	28.7357	68.2935	35.03	76.5186		12.5648	10.9638	15.9737		50.8991	33.0636	44.3984		1.35733		21.8423		45.5392		20.4144
Cs	3.02143	1.5317	2.24486	2.45846	2.36665	2.90466	1.17037	1.80255	2.2339	2.55342		2.64133	3.54012	3.81059	4.10207	4.74105	1.8571	2.62114	3.05726	1.16093	2.92927	3.41924	3.3433	1.64179		3.19647		3.10497	0.83941	1.20739	2.48961	4.93121	2.3845		0.38214	0.180613	0.5522		3.06621	1.06047	1.20303		0.148336		0.72679		1.55815		0.631977
Sr	27.803	27.5612	27.9826	28.1096	41.9386	33.1258	30.6307	22.7385	31.0006	33.1184		111.128	71.2818	107.629	177.087	169.153	177.095	126.815	107.799	130.717	75.101	168.42	157.927	35.9845		16.9141		255.847	177.368	246.776	160.932	233.44	204.276		1057.35	1344.19	1506.92		894.222	493.532	519.022		351.224		413.173		374.039		419.522
Sc	3.44948	3.7147	3.59327	3.64437	4.46437	4.30486	3.60363	3.30116	3.29809	4.27392		10.9314	4.87913	2.68397	6.51228	5.97022	19.3212	6.7515	4.30675	6.23604	4.12582	8.76572	7.61912	3.59648		4.59261		25.0516	11.1952	27.9616	11.365	21.4072	14.0488		21.8083	21.2844	23.1778		13.7592	10.9526	12.1554		34.8587		35.5209		34.7648		35.5085
Zr	441.071	456.373	462.508	454.925	441.716	439.528	449.31	408.913	457.519	472.377		365.118	396.949	362.456	319.329	337.353	211.808	174.929	404.75	383.687	344.388	313.985	324.639	335.089		304.262		198.424	336.232	161.013	349.728	193.077	304.876		161.347	146.646	167.954		252.874	137.044	204.932		71.9515		145.122		222.016		145.743
Abbreviations
DIT1 = Dinner Creek Unit 1
DIT2 = Dinner Creek Unit 2
DIT3 = Dinner Creek Unit 3
DIT4 = Dinner Creek Unit 4
RB = Ring Butte Volcanics
LM = Little Malheur River 'andesite'
BC = Birch Creek
UPC = Upper Pole Creek
LPC = Lower Pole Creek
HC = Hunter Creek
TP = Tim's Peak
[truncated: 12 more columns]
